# Supplementary material for: The Construction and Use of Log-Odds Substitution Scores for Multiple Sequence Alignment
Source: PubMed Central journal article supplement (PMC2904766; doi:10.1371/journal.pcbi.1000852), 2010-07-15
Supplement: pcbi.1000852.s002.pdf [file pcbi.1000852.s002.pdf]

## Text S2: The Mean Relative Entropy of Dirichlet Mixtures

We are first interested in calculating  $\hat{\mathcal{D}}$ , the mean value of the relative entropy  $\sum_i q_i \ln(q_i/p_i)$  when the probability density of  $\vec{q}$  follows a Dirichlet distribution. (Note that throughout this appendix we use natural logarithms, and all relative entropies are therefore expressed in nats rather than bits.) Specifically, as stated in the main text,  $\rho(\vec{q}) \equiv \mathcal{Z} \prod_j q_j^{\alpha_j-1}$ , where  $\mathcal{Z} = \Gamma(\alpha^*)/\prod_j \Gamma(\alpha_j)$ . The domain of  $\vec{q}$  is the simplex  $\mathcal{P}$  defined by  $0 \leq q_i \leq 1$  and  $\sum_i q_i = 1$ . The scalar  $\mathcal{Z}$  arises from the fact that

$$\int_{\vec{q} \in \mathcal{P}} \prod_j q_j^{\alpha_j-1} d\vec{q} = \frac{\prod_j \Gamma(\alpha_j)}{\Gamma(\alpha^*)}. \quad (1)$$

The mean value of the  $i$ th component of the relative entropy is given by

$$\begin{aligned} \mathcal{Z} \int_{\vec{q} \in \mathcal{P}} \left[ q_i \ln \frac{q_i}{p_i} \right] \prod_j q_j^{\alpha_j-1} d\vec{q} &= \mathcal{Z} \int_{\vec{q} \in \mathcal{P}} [\ln q_i - \ln p_i] q_i^{\alpha_i} \prod_{j \neq i} q_j^{\alpha_j-1} d\vec{q} \\ &= \mathcal{Z} [\partial_{\alpha_i} - \ln p_i] \int_{\vec{q} \in \mathcal{P}} q_i^{\alpha_i} \prod_{j \neq i} q_j^{\alpha_j-1} d\vec{q} = \mathcal{Z} [\partial_{\alpha_i} - \ln p_i] \frac{\Gamma(\alpha_i + 1) \prod_{j \neq i} \Gamma(\alpha_j)}{\Gamma(\alpha^* + 1)} \\ &= \mathcal{Z} [\psi(\alpha_i + 1) - \ln p_i - \psi(\alpha^* + 1)] \frac{\Gamma(\alpha_i + 1) \prod_{j \neq i} \Gamma(\alpha_j)}{\Gamma(\alpha^* + 1)} \\ &= [\psi(\alpha_i + 1) - \ln p_i - \psi(\alpha^* + 1)] \frac{\alpha_i}{\alpha^*}, \end{aligned} \quad (2)$$

where  $\psi(x) \equiv (d/dx) \ln \Gamma(x)$ . When we sum (2) over all  $i$ , noting that  $\sum_i \alpha_i = \alpha^*$ , we find that

$$\hat{\mathcal{D}} = \mathcal{Z} \int_{\vec{q} \in \mathcal{P}} \left[ \sum_i q_i \ln \frac{q_i}{p_i} \right] \prod_j q_j^{\alpha_j-1} d\vec{q} = \left\{ \sum_i [\psi(\alpha_i + 1) - \ln p_i] \frac{\alpha_i}{\alpha^*} \right\} - \psi(\alpha^* + 1). \quad (3)$$

For a Dirichlet mixture, we have  $\hat{\mathcal{D}} = \sum_k m_k \hat{\mathcal{D}}_k$ , where  $\hat{\mathcal{D}}_k$  is the mean relative entropy of the  $k$ th component Dirichlet distribution.

A simple numerical formula for the digamma function  $\psi(x)$  is

$$\psi(x+1) = -\gamma + \sum_{k=1}^{\infty} \left( \frac{1}{k} - \frac{1}{x+k} \right) = -\gamma + \sum_{k=1}^{\infty} \frac{x}{k(x+k)}, \quad (4)$$

where  $\gamma$  is the Euler's constant 0.5772.... Because eq. (3) involves a difference of digamma functions, the  $\gamma$  term in eq. (4) is irrelevant.
