# Supplementary material for: The Construction and Use of Log-Odds Substitution Scores for Multiple Sequence Alignment
Source: PLoS Comput Biol. 2010 Jul 15;6(7):e1000852. doi: 10.1371/journal.pcbi.1000852 (PMC2904766; doi:10.1371/journal.pcbi.1000852)
Supplement: Table S1 — Helix-turn-helix proteins. (0.02 MB PDF) [file pcbi.1000852.s006.pdf]

**Table S1. Helix-turn-helix proteins.**

|    | Protein or<br>gene name | Swiss-Prot<br>accession number |
|----|-------------------------|--------------------------------|
| 1  | MATa1                   | P01366                         |
| 2  | Sigma-37                | P06574                         |
| 3  | Pin                     | P03014                         |
| 4  | P22 Cro                 | P09964                         |
| 5  | GalR                    | P03024                         |
| 6  | MerD                    | P08654                         |
| 7  | TetR                    | P04483                         |
| 8  | P22 c1                  | P03041                         |
| 9  | TrpR                    | P0A881                         |
| 10 | Antennapedia (Antp)     | P02833                         |
| 11 | NahR                    | P10183                         |
| 12 | Fnr                     | P0A9E5                         |
| 13 | Crp (CAP)               | P0ACJ8                         |
| 14 | AraC                    | P0A9E0                         |
| 15 | LexA                    | P0A7C2                         |
| 16 | NtrC (K.p.)             | P03029                         |
| 17 | Lambda Cro              | P03040                         |
| 18 | DeoR                    | P0ACK5                         |
| 19 | LacI                    | P03023                         |
| 20 | Sigma-32 (rpoH,htpR)    | P0AGB3                         |
| 21 | SpoIIGB                 | P06222                         |
| 22 | NtrC (Brady.)           | P10576                         |
| 23 | DicA                    | P06966                         |
| 24 | SpoIIIC                 | P12254                         |
| 25 | EbgR                    | P06846                         |
| 26 | Lambda cII              | P03042                         |
| 27 | Fis                     | P0A6R3                         |
| 28 | NifA                    | P03027                         |
| 29 | CytR                    | P0ACN7                         |
| 30 | PurR                    | P0ACP7                         |
